# Supplementary material
Source: Springer Nature journal article supplement (https://www.springermedizin.de/resource/supplementary/12993_2012_453_MOESM2_ESM.pdf/9617796)

△ saline  
▲ baclofen (0.5 nmol)

○ 2 M NaCl + saline  
● 2 M NaCl + baclofen (0.5 nmol)

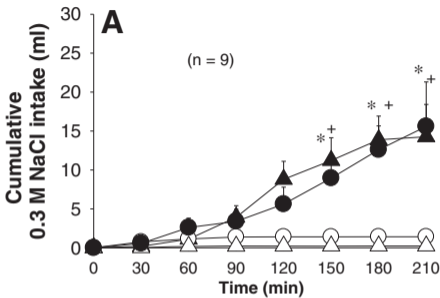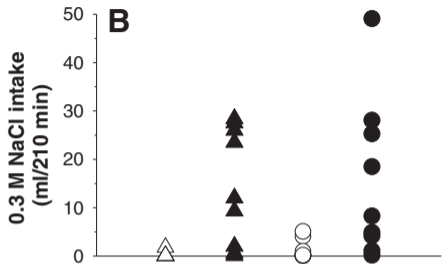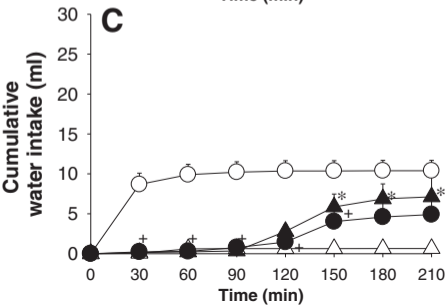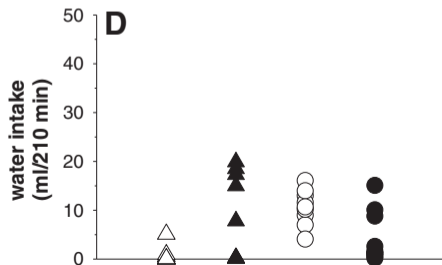

Supplement: MOESM2 [file 9617796]
